# Supplementary material for: Effectiveness of CKD Exacerbation Countermeasures in Izumo City
Source: MDPI journal article supplement (doi:10.3390/jpm11111104), 2021-10-28
Supplement: s1 [file s1]

**Supplementary Table S1.** Baseline characteristics of adults with specific health checkups in FY2018 and FY2019

|                                            | FY2018       | FY2019       |
|--------------------------------------------|--------------|--------------|
| Number*                                    | 11,061       | 10,717       |
| Age, years                                 | 68 [64–71]   | 69 [64–72]   |
| Male, n (%)                                | 4,969 (44.9) | 4,833 (45.1) |
| Current smokers, n (%)                     | 1,334 (12.1) | 1,298 (12.1) |
| Drinking frequency, Rare, n (%)            | 5,780 (52.3) | 5,617 (52.4) |
| Occasional                                 | 2,231 (20.2) | 2,150 (20.1) |
| Daily                                      | 3,050 (27.6) | 2,950 (27.5) |
| Body mass index, kg/m <sup>2</sup>         | 23.0 ± 3.4   | 22.9 ± 3.5   |
| Systolic blood pressure, mmHg              | 132 ± 17     | 131 ± 17     |
| Diastolic blood pressure, mmHg             | 77 ± 11      | 77 ± 11      |
| Triglyceride, mg/dL                        | 97 [70–137]  | 96 [68–137]  |
| Low-density lipoprotein cholesterol, mg/dL | 121 ± 30     | 119 ± 30     |
| Hemoglobin A1c, %                          | 5.7 ± 0.6    | 5.8 ± 0.7    |
| eGFR, mL/min/1.73m <sup>2</sup>            | 75 ± 15      | 73 ± 14      |
| Urinary protein, negative, n (%)           | 9,277 (83.9) | 8,946 (83.5) |
| ±                                          | 1,061 (9.6)  | 1,040 (9.7)  |
| 1+                                         | 512 (4.6)    | 507 (4.7)    |
| ≥2+                                        | 211 (1.9)    | 224 (2.1)    |
| Current treatment for hypertension, n (%)  | 4,358 (39.4) | 4,293 (40.1) |
| dyslipidemia                               | 3,095 (28.0) | 3,069 (28.6) |
| diabetes                                   | 925 (8.4)    | 890 (8.3)    |
| History of cardiovascular disease, n (%)   | 873 (7.9)    | 883 (8.2)    |

Data are presented as mean ± standard deviation, median (25%–75%), or n (%)

eGFR, estimated glomerular filtration rate

\* Adults who had no missing baseline data at specific health checkups

**Supplementary Table S2.** Baseline characteristics of CKD re-examination candidates in FY2018 and FY2019

|                                            | FY2018       | FY2019       | P-value |
|--------------------------------------------|--------------|--------------|---------|
| Number*                                    | 826          | 864          |         |
| Age, years                                 | 69 [66–72]   | 70 [66–72]   | 0.840   |
| Male, n (%)                                | 630 (76.3)   | 677 (78.4)   | 0.306   |
| Current smokers, n (%)                     | 120 (14.5)   | 142 (16.4)   | 0.279   |
| Drinking frequency, Rare, n (%)            | 372 (45.0)   | 417 (48.3)   | 0.117   |
| Occasional                                 | 167 (20.2)   | 142 (16.4)   |         |
| Daily                                      | 287 (34.7)   | 305 (35.3)   |         |
| Body mass index, kg/m <sup>2</sup>         | 24.0 ± 3.6   | 24.2 ± 3.5   | 0.289   |
| Systolic blood pressure, mmHg              | 134 ± 18     | 133 ± 18     | 0.348   |
| Diastolic blood pressure, mmHg             | 79 ± 12      | 79 ± 12      | 0.739   |
| Triglyceride, mg/dL                        | 116 [81–172] | 117 [83–166] | 0.927   |
| Low-density lipoprotein cholesterol, mg/dL | 116 ± 33     | 113 ± 31     | 0.083   |
| Hemoglobin A1c, %                          | 5.9 ± 0.8    | 6.0 ± 0.9    | 0.110   |
| eGFR, mL/min/1.73m <sup>2</sup>            | 53 ± 14      | 54 ± 13      | 0.600   |
| Urinary protein, negative, n (%)           | 478 (57.9)   | 527 (61.0)   | 0.416   |
| ±                                          | 84 (10.2)    | 70 (8.1)     |         |
| 1+                                         | 60 (7.3)     | 62 (7.2)     |         |
| ≥2+                                        | 204 (24.7)   | 205 (23.7)   |         |
| Current treatment for hypertension, n (%)  | 510 (61.7)   | 514 (59.5)   | 0.343   |
| dyslipidemia                               | 277 (33.5)   | 308 (35.6)   | 0.361   |
| diabetes                                   | 137 (16.6)   | 149 (17.2)   | 0.718   |
| History of cardiovascular disease, n (%)   | 114 (13.8)   | 134 (15.5)   | 0.321   |

Data are presented as mean ± standard deviation, median (25%–75%), or n (%)

eGFR, estimated glomerular filtration rate

\* CKD re-examination candidates who had no missing baseline data at specific health checkups

**Supplementary Table S3.** Baseline characteristics of CKD re-examination implementation in FY2018 and FY2019

|                                            | FY2018       | FY2019       | P-value |
|--------------------------------------------|--------------|--------------|---------|
| Number*                                    | 826          | 864          |         |
| Age, years                                 | 69 [66–72]   | 70 [66–72]   | 0.840   |
| Male, n (%)                                | 630 (76.3)   | 677 (78.4)   | 0.306   |
| Current smokers, n (%)                     | 120 (14.5)   | 142 (16.4)   | 0.279   |
| Drinking frequency, Rare, n (%)            | 372 (45.0)   | 417 (48.3)   | 0.117   |
| Occasional                                 | 167 (20.2)   | 142 (16.4)   |         |
| Daily                                      | 287 (34.7)   | 305 (35.3)   |         |
| Body mass index, kg/m <sup>2</sup>         | 24.0 ± 3.6   | 24.2 ± 3.5   | 0.289   |
| Systolic blood pressure, mmHg              | 134 ± 18     | 133 ± 18     | 0.348   |
| Diastolic blood pressure, mmHg             | 79 ± 12      | 79 ± 12      | 0.739   |
| Triglyceride, mg/dL                        | 116 [81–172] | 117 [83–166] | 0.927   |
| Low-density lipoprotein cholesterol, mg/dL | 116 ± 33     | 113 ± 31     | 0.083   |
| Hemoglobin A1c, %                          | 5.9 ± 0.8    | 6.0 ± 0.9    | 0.110   |
| eGFR, mL/min/1.73m <sup>2</sup>            | 53 ± 14      | 54 ± 13      | 0.600   |
| Urinary protein, negative, n (%)           | 478 (57.9)   | 527 (61.0)   | 0.416   |
| ±                                          | 84 (10.2)    | 70 (8.1)     |         |
| 1+                                         | 60 (7.3)     | 62 (7.2)     |         |
| ≥2+                                        | 204 (24.7)   | 205 (23.7)   |         |
| Current treatment for hypertension, n (%)  | 510 (61.7)   | 514 (59.5)   | 0.343   |
| dyslipidemia                               | 277 (33.5)   | 308 (35.6)   | 0.361   |
| diabetes                                   | 137 (16.6)   | 149 (17.2)   | 0.718   |
| History of cardiovascular disease, n (%)   | 114 (13.8)   | 134 (15.5)   | 0.321   |

Data are presented as mean ± standard deviation, median (25%–75%), or n (%)

eGFR, estimated glomerular filtration rate

\* Adults who underwent CKD re-examination and had no missing baseline data at specific health checkups
